# Supplementary material
Source: bioRxiv or medRxiv preprint supplement (https://medrxiv.org/highwire/filestream/80310/field_highwire_adjunct_files/1/2020.05.07.20093955-2.pdf)
Supplement: Supplementary file [file 2020.05.07.20093955-2.pdf]

# Utility and limitations of Google searches on sensory loss as markers for new COVID-19 cases

## Supplementary Figure S2

Supplementary Figure S2 extends the period covered in Figure 3, and shows an increase in popularity of searches before the news appeared for Italy, but not for US, the “surprise rise” in both countries with media and new cases rising, and then the “knowledge saturation”, where the baseline of searches is somewhat higher than before, but overall low and not reflective of the number of new cases in the country.

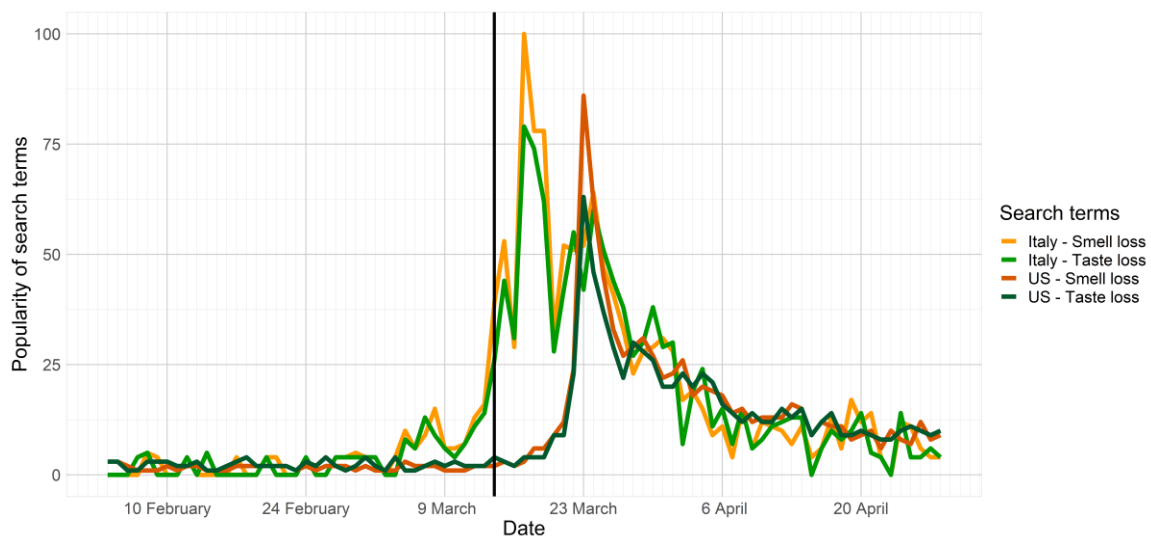

**Figure S2:** Popularity of smell loss and taste loss searches for Italy and US from February 4th - one month before the data analyzed in this work - to April 28th. The first time in the media on March 14th is shown as a black vertical line.
